# Supplementary material for: Surface oxygen vacancy and defect engineering of WO3 for improved visible light photocatalytic performance
Source: Royal Society of Chemistry journal article supplement (doi:10.1039/c8cy00994e), 2018-01-01
Supplement: c8cy00994e1.pdf [file c8cy00994e1.pdf]

## Supporting Information

### Surface oxygen vacancy and defect engineering of $\text{WO}_3$ for improved visible light photocatalytic performance

Qi Liu, Fengjiao Wang, Huaxiang Lin,\* Yanyu Xie, Na Tong, Jinjin Lin, Xiaoyan Zhang, Zizhong Zhang, and XuXu Wang\*

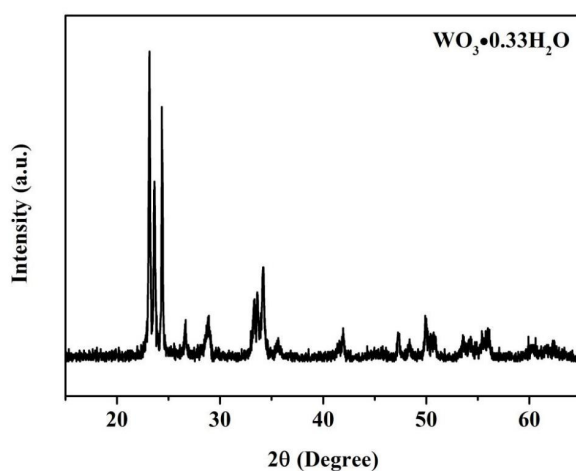

Fig. S1 XRD patten of  $\text{WO}_3 \cdot 0.33\text{H}_2\text{O}$ .

In Fig. S2, the W 4f XPS bimodal peaks gradually moved in the direction of the high field as vacuum treatment temperature increases. This indicates the change in the valence state of W.

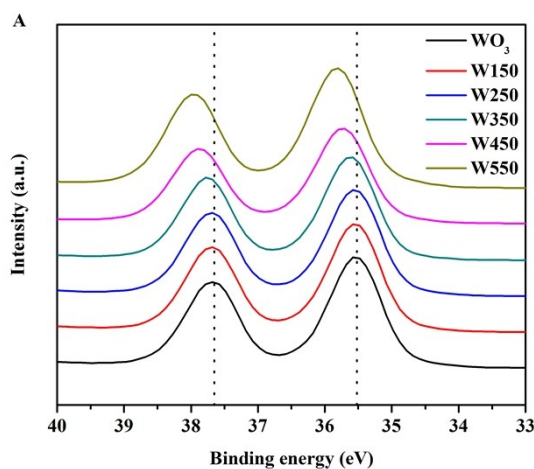

Fig. S2 W 4f XPS spectra of all samples.
